# Supplementary material for: Pressure-induced phase transition toward high symmetry in zero-strain Li2TiO3
Source: Royal Society of Chemistry journal article supplement (doi:10.1039/d2cp05782d), 2023-01-01
Supplement: d2cp05782d1.pdf [file d2cp05782d1.pdf]

## Supplementary Information

### Pressure-induced phase transition toward high symmetry in zero-strain $\text{Li}_2\text{TiO}_3$

Wenming Qi,<sup>a,b</sup> Hadiqa Abdugopur,<sup>b</sup> Wei Xu,<sup>b</sup> Min Gao,<sup>\*a,b</sup> Anwar Hushur<sup>\*b</sup> and Hongyan Zhang<sup>\*a,b</sup>

<sup>a</sup> *Xinjiang Key Laboratory of Solid State Physics and Devices, Xinjiang University, People's Republic of China*

<sup>b</sup> *School of Physics Science and Technology, Xinjiang University, People's Republic of China*

#### Contents:

Figure S1. The XPS analysis of  $\text{Li}_2\text{TiO}_3$ .

Figure S2. The calculated Raman spectra and phonon dispersion of  $\text{Li}_2\text{TiO}_3$  under high pressure.

Figure S3. In-situ high pressure Raman spectra under PTM (NaCl).

**Figure S1. The XPS analysis of  $\text{Li}_2\text{TiO}_3$ .**

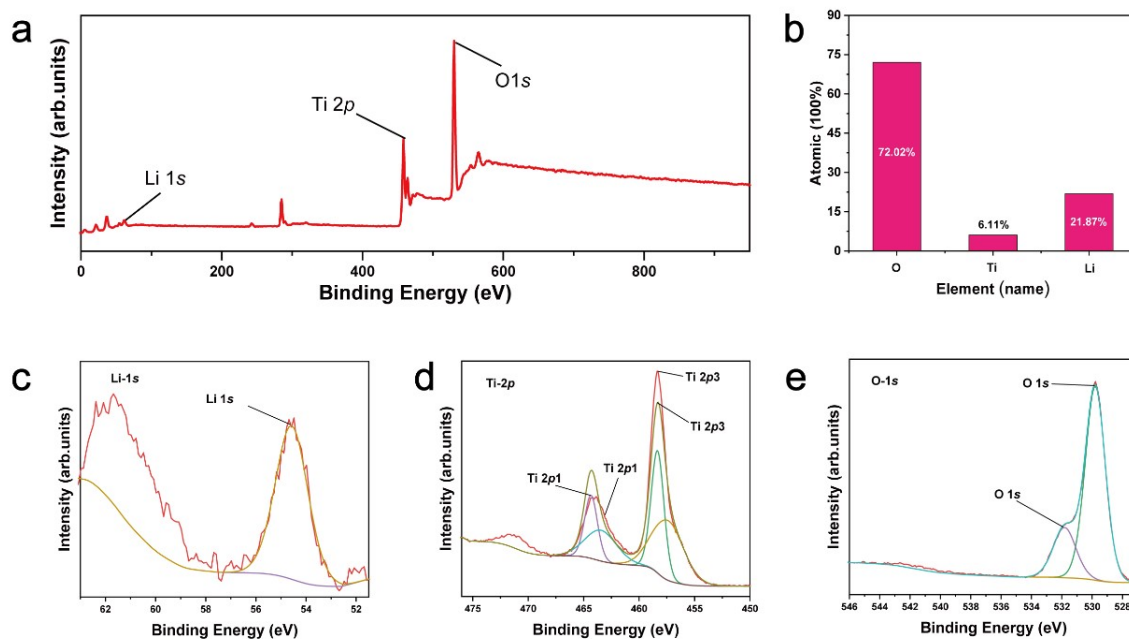

**Figure S1** XPS analysis of  $\text{Li}_2\text{TiO}_3$ , (a) Survey spectrum, (b) Stoichiometric ratio of each element, (c) Li 1s, (d) Ti 2p, (e) O 1s.

**Figure S2. The calculated Raman spectra and phonon dispersion of  $\text{Li}_2\text{TiO}_3$  under high pressure**

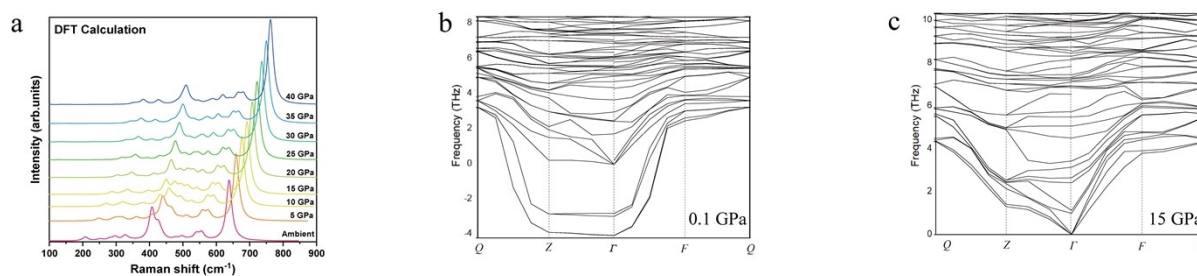

**Figure S2** (a) The calculated Raman spectra of  $\text{Li}_2\text{TiO}_3$  in the range between 0.1 and 40 GPa. (b) and (c) are phonon dispersion spectra of  $\text{Li}_2\text{TiO}_3$  under 0.1 and 15 GPa, respectively.

**Figure S3. In-situ high pressure Raman spectra under PTM (NaCl).**

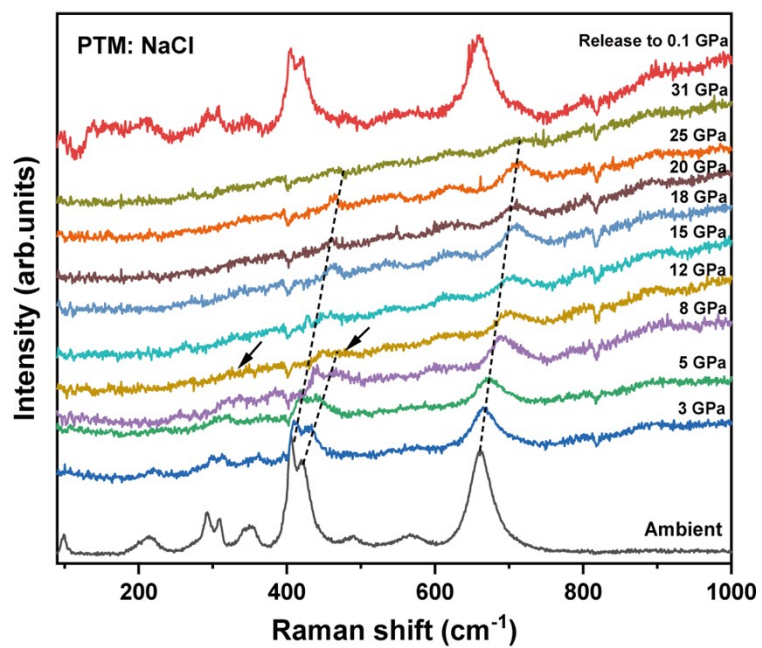

**Figure S3** In-situ high pressure Raman spectra under PTM (NaCl).

---
